# Supplementary material
Source: PubMed Central journal article supplement (PMC4275428)
Supplement: NIHMS596808-supplement-2.pdf [file NIHMS596808-supplement-2.pdf]

Figure S1

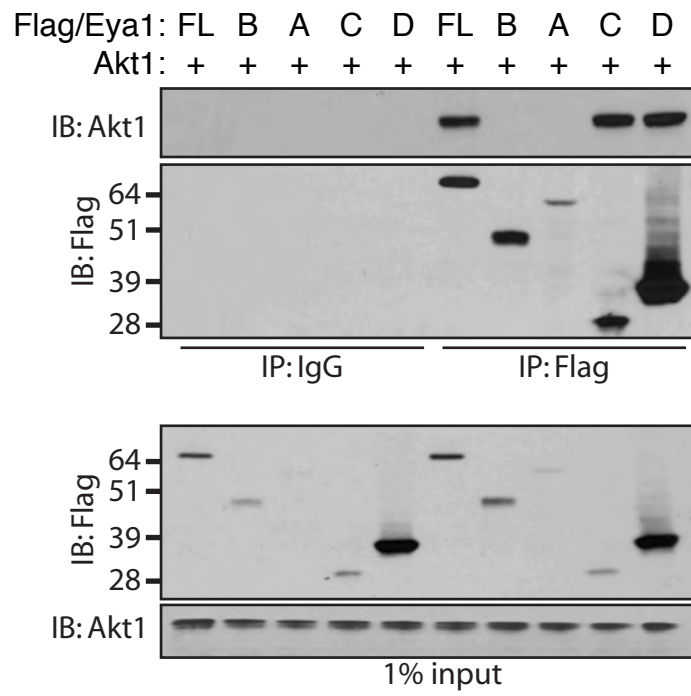

Figure S2

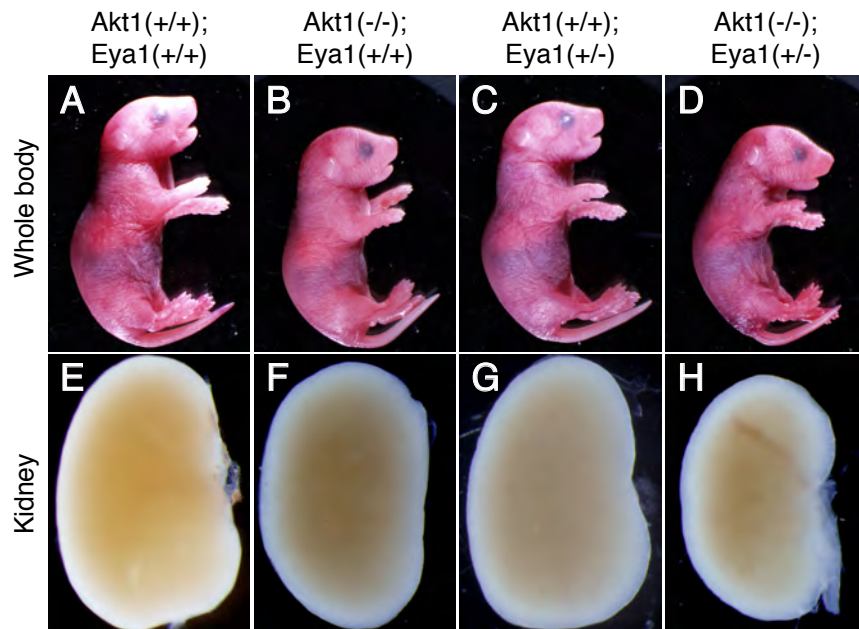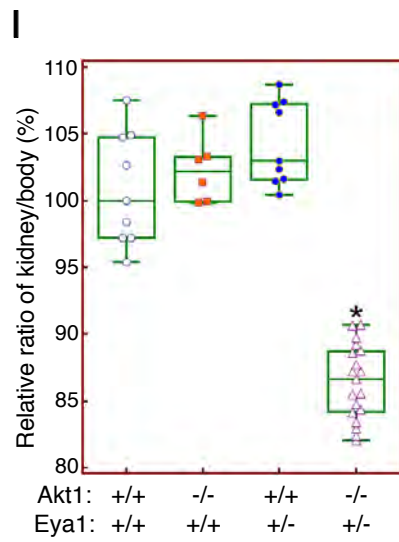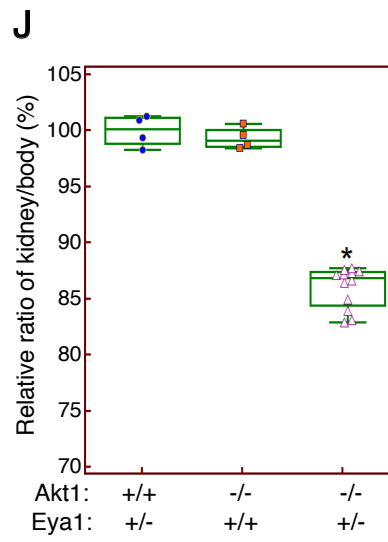

Figure S3

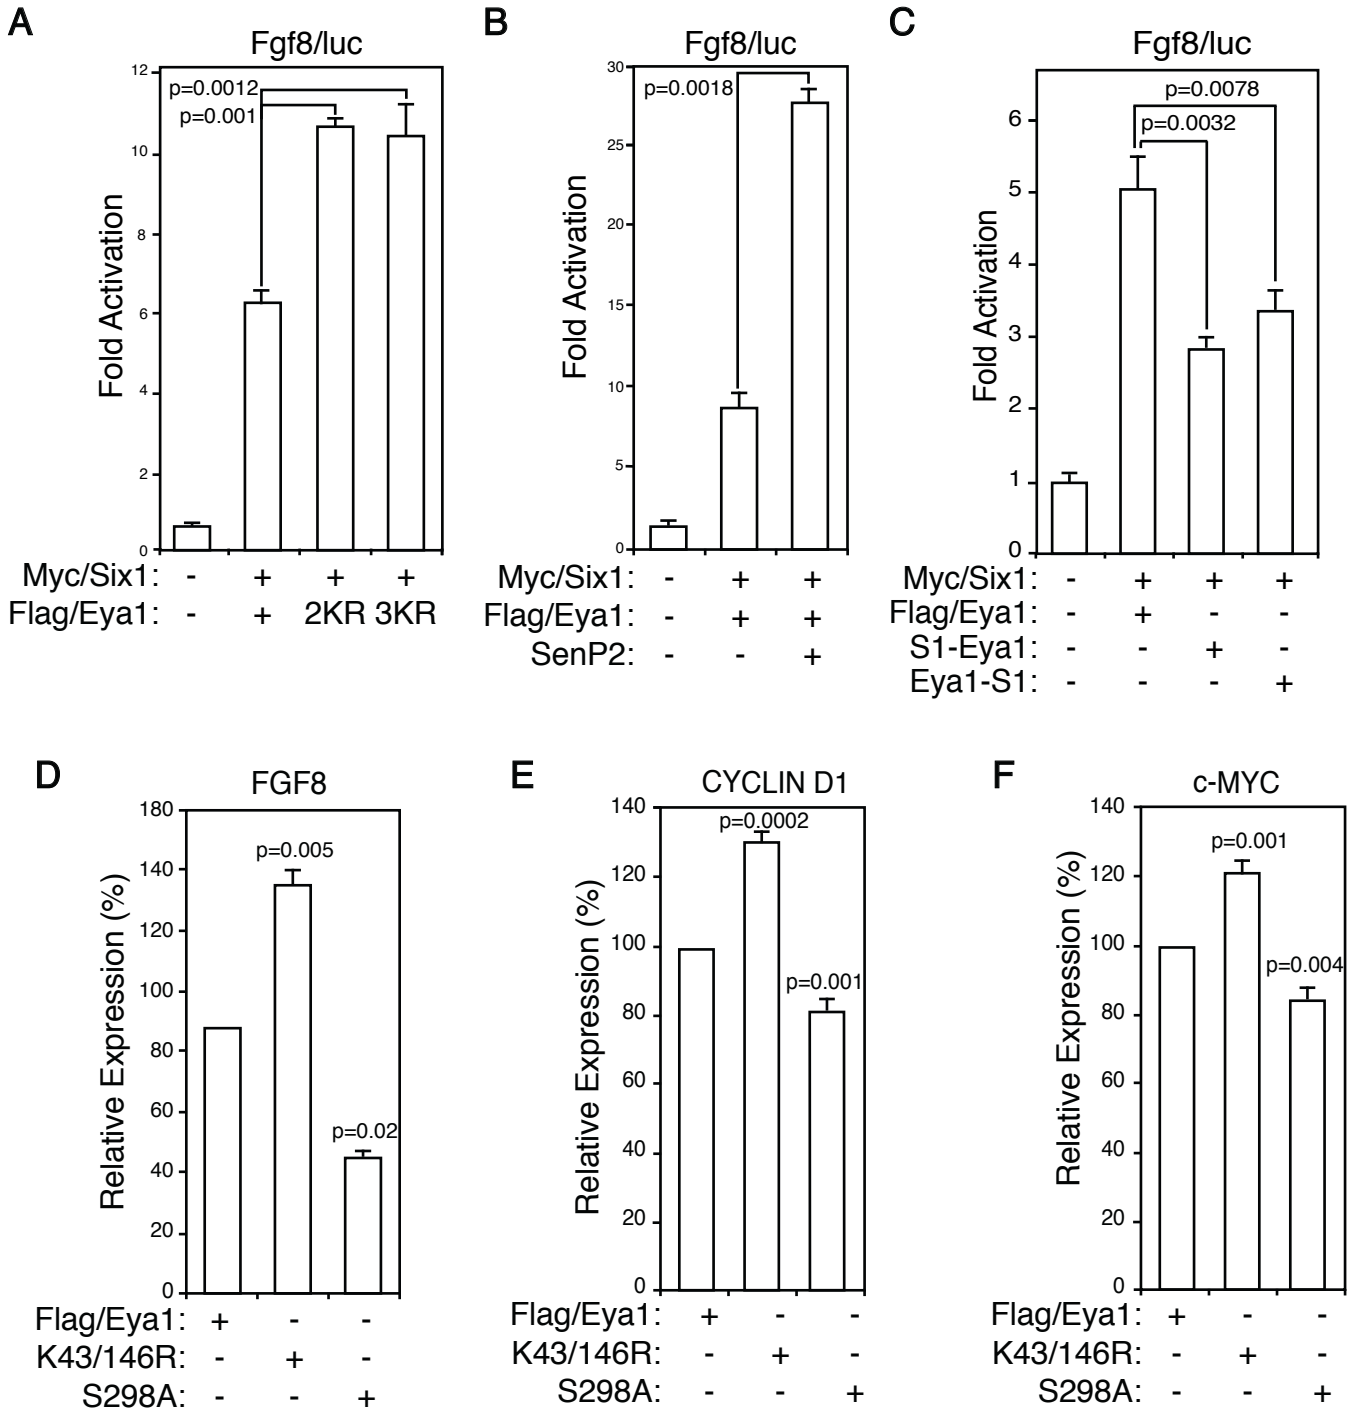

Figure S4

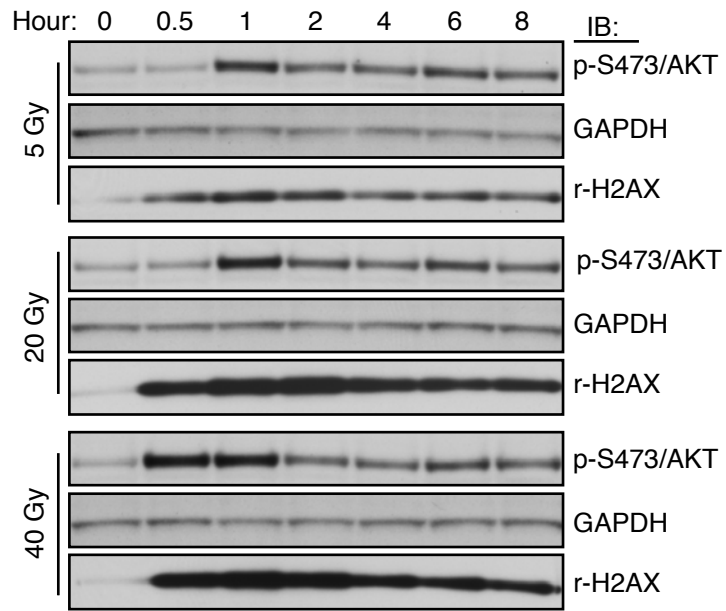

Figure S5

A

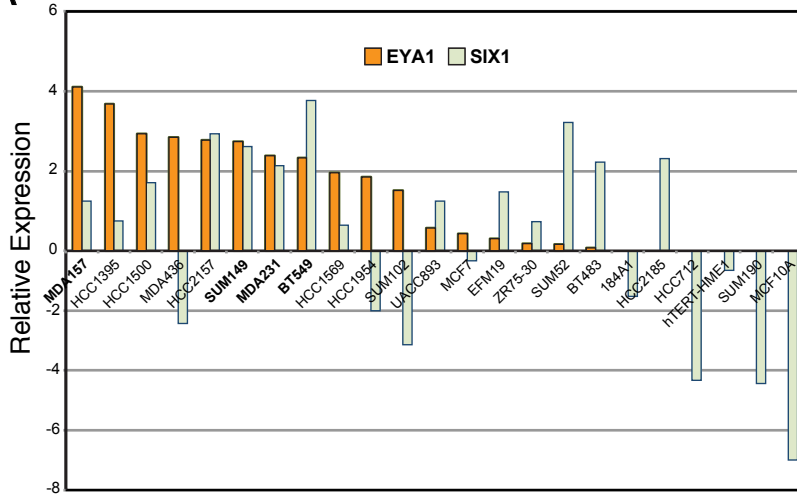

B

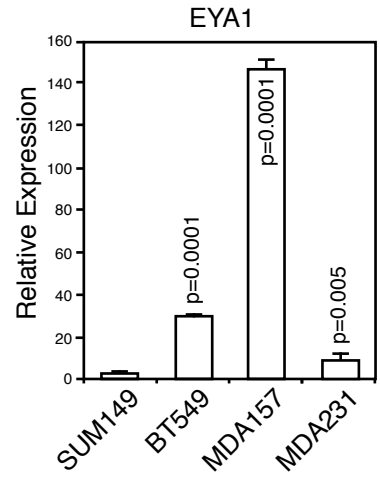

C

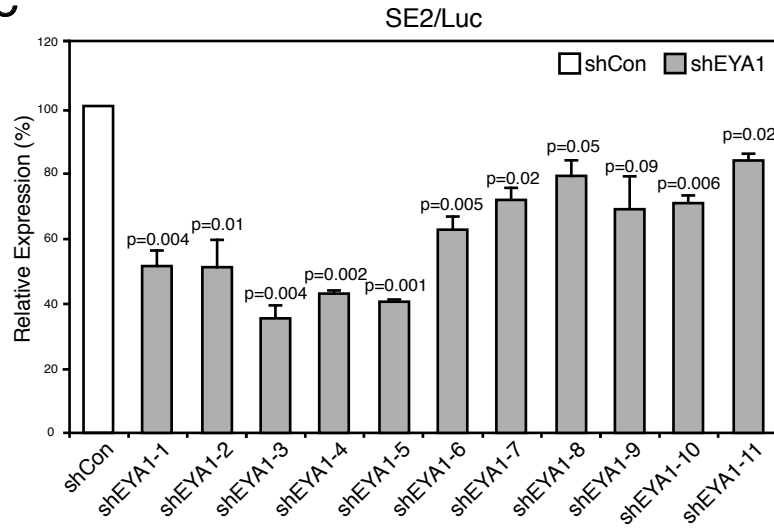

D

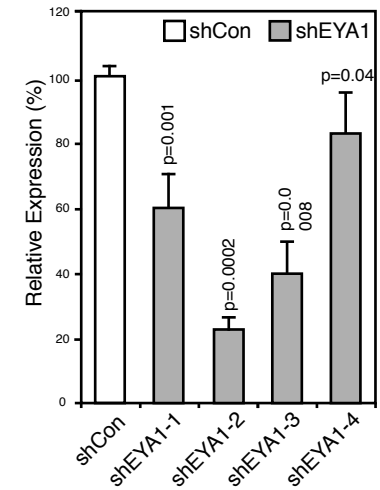

Figure S6

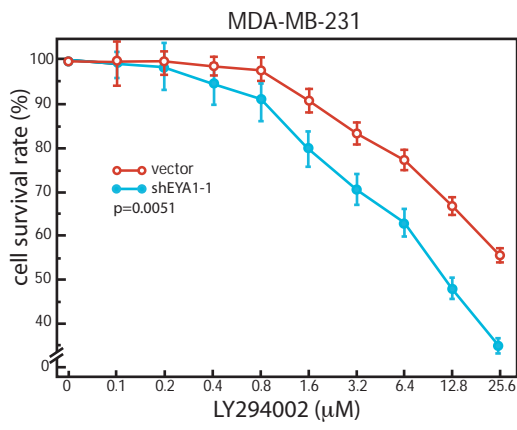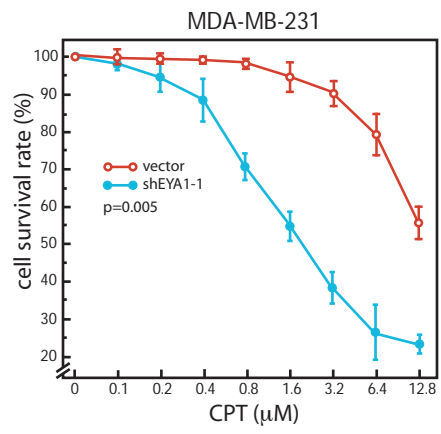

| Name      | Sequence              | Human  | Mouse    |
|-----------|-----------------------|--------|----------|
| shEYA1-1  | TCAGAACAGCTGTTGACTCTA | 3'-UTR | Y-3'-UTR |
| shEYA1-2  | TAGTACTGTGAATCCAGTGAA | 3'-UTR | Y-3'-UTR |
| shEYA1-3  | GACTGAAGGTGGATTGTCA   | ORF    | NR       |
| shEYA1-4  | GCACATTATATGACCAGCA   | ORF    | NR       |
| shEYA1-5  | CAGGACCTAAGCACATATA   | ORF    | NR       |
| shEYA1-6  | GGAAGACACACGATGCTAA   | 3'-UTR | NR       |
| shEYA1-7  | CGACGGGTCTTTAAACAATTT | ORF    | NR       |
| shEYA1-8  | GCCGAAGAAACAATAATCCTT | ORF    | NR       |
| shEYA1-9  | CGGACAAACTGTGTGAATATT | ORF    | NR       |
| shEYA1-10 | CCCGGACAAACTGTGTGAATA | ORF    | NR       |
| shEYA1-11 | CCCACAAAGAATATAGATGAT | 3'-UTR | NR       |

**Table S1. Targeting sequence of shEYA1 lentiviral constructs.**

ORF, open reading frame; UTR, untranslated region; NR, not recognized.
